# Supplementary material
Source: Springer Nature journal article supplement (https://www.springermedizin.de/resource/supplementary/13063_2013_1481_MOESM3_ESM.pdf/9620150)
Supplement: MOESM3 [file 9620150]

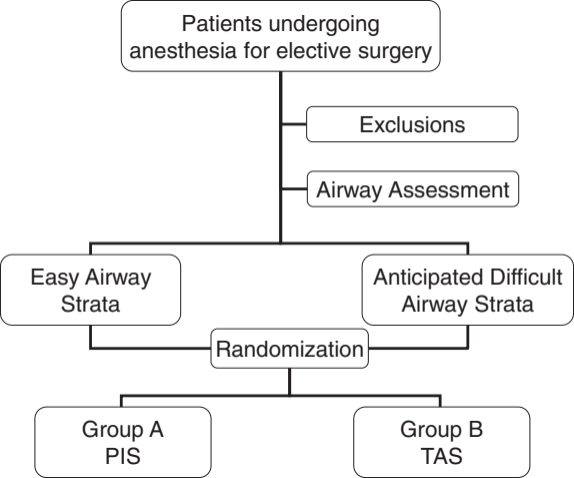

Patients undergoing anesthesia for elective surgery

Exclusions

Airway Assessment

Easy Airway Strata

Anticipated Difficult Airway Strata

Randomization

Group A PIS

Group B TAS
